# Supplementary material for: Access to personal protective equipment in exposed healthcare workers and COVID-19 illness, severity, symptoms and duration: a population-based case-control study in six countries
Source: PubMed Central journal article supplement — BMJ Glob Health. 2021 Jan 28;6(1):e004611. doi: 10.1136/bmjgh-2020-004611 (PMC7844929; doi:10.1136/bmjgh-2020-004611), 2021-01-28
Supplement: bmjgh-2020-004611supp001.pdf [file bmjgh-2020-004611supp001.pdf]

**Supplemental Table 1.** Access to personal protective equipment (PPE) and odds ratios of Covid-19 like illness in exposed healthcare workers

|                                                                                                                                                    | <b>OR (95% CI)</b> | <b>P-value</b> | <b>P-trend</b> |
|----------------------------------------------------------------------------------------------------------------------------------------------------|--------------------|----------------|----------------|
| <b>Access to PPE All Countries combined*</b><br>( <b>N=2884 total; 568 cases (20%)</b> ):                                                          |                    |                | <0.0001        |
| Nonexistent (no access to at least one of the following: masks, face shields, gowns, and gloves) (n=17; 9 cases)                                   | 7.98 (2.86-22.31)  | <0.0001        |                |
| Poor (little access to masks, face shields, gowns, and gloves) (n=288; 94 cases)                                                                   | 2.72 (1.91-3.87)   | <0.0001        |                |
| Basic (access to at least one daily mask, face shield, gown, and gloves) (n=728; 162 cases)                                                        | 1.86 (1.39-2.49)   | <0.0001        |                |
| Good (I had access to a change of mask, gown, and gloves if soiled as well as a face shield) (n=1,141; 210 cases)                                  | 1.50 (1.14-1.97)   | 0.004          |                |
| Excellent (I had access to a fresh mask, gown, and gloves every time that I entered a new patient room as well as a face shield) (n=710; 93 cases) | Ref                | --             |                |
| <b>USA** (N=1061 total; 160 cases (15%))</b>                                                                                                       |                    |                | 0.0002         |
| Nonexistent (n=5; 3 cases)                                                                                                                         | 11.1 (1.71-72.3)   | 0.012          |                |
| Poor (n=70; 16 cases)                                                                                                                              | 2.23 (1.10-4.49)   | 0.042          |                |
| Basic (n=298; 59 cases)                                                                                                                            | 2.05 (1.25-3.37)   | 0.005          |                |
| Good (n=446; 54 cases)                                                                                                                             | 1.21 (0.73-1.99)   | 0.45           |                |
| Excellent (n=242; 28 cases)                                                                                                                        | Ref                | --             |                |
| <b>UK** (N=327 total; 94 cases (29%))</b>                                                                                                          |                    |                | 0.0003         |
| Nonexistent (n=2; 2 cases)                                                                                                                         | --                 | --             |                |
| Poor (n=18; 10 cases)                                                                                                                              | 5.86 (1.93-17.8)   | 0.002          |                |
| Basic (n=62; 21 cases)                                                                                                                             | 2.22 (1.05-4.67)   | 0.021          |                |
| Good (n=140; 41 cases)                                                                                                                             | 1.69 (0.91-3.145)  | 0.100          |                |
| Excellent (n=105; 20 cases)                                                                                                                        | Ref                | --             |                |
| <b>Spain** (N=528 total; 146 cases (28%))</b>                                                                                                      |                    |                | 0.0002         |
| Nonexistent (n=3; 2 cases)                                                                                                                         | 22.9 (1.74-301)    | 0.017          |                |
| Poor (n=109; 42 cases)                                                                                                                             | 3.49 (1.53-7.93)   | 0.003          |                |
| Basic (n=152; 47 cases)                                                                                                                            | 2.56 (1.15-5.69)   | 0.021          |                |
| Good (n=197; 46 cases)                                                                                                                             | 1.82 (0.82-4.04)   | 0.131          |                |
| Excellent (n=67; 9 cases)                                                                                                                          | Ref                | --             |                |
| <b>Italy** (N=433 total; 74 cases (17%))</b>                                                                                                       |                    |                | 0.015          |
| Nonexistent (n=1; 1 case)                                                                                                                          | --                 | --             |                |
| Poor (n=46; 13 cases)                                                                                                                              | 3.12 (1.36-7.15)   | 0.007          |                |
| Basic (n=82; 12 cases)                                                                                                                             | 1.39 (0.63-3.07)   | 0.42           |                |
| Good (n=138; 30 cases)                                                                                                                             | 2.32 (1.22-4.44)   | 0.010          |                |
| Excellent (n=165; 18 cases)                                                                                                                        | Ref                | --             |                |
| <b>Germany** (N=279 total; 46 (16%))</b>                                                                                                           |                    |                | 0.34           |
| Nonexistent (n=1; 0 case)                                                                                                                          | --                 | --             |                |
| Poor (n=21; 6 cases)                                                                                                                               | 2.80 (0.84-9.39)   | 0.106          |                |
| Basic (n=82; 12 cases)                                                                                                                             | 1.08 (0.41-2.84)   | 0.95           |                |
| Good (n=111; 19 cases)                                                                                                                             | 1.41 (0.58-3.43)   | 0.44           |                |

|                                               |                   |       |             |
|-----------------------------------------------|-------------------|-------|-------------|
| Excellent (n=64; 9 cases)                     | Ref               | --    |             |
| <b>France** (N=256 total; 48 cases (19%))</b> |                   |       | <b>0.19</b> |
| Nonexistent (n=5; 1 case)                     | 1.81 (0.17-19.22) | 0.61  |             |
| Poor (n=24; 7 cases)                          | 2.20 (0.69-7.03)  | 0.180 |             |
| Basic (n=51; 11 cases)                        | 1.53 (0.56-4.19)  | 0.95  |             |
| Good (n=109; 20 cases)                        | 1.36 (0.56-3.30)  | 0.49  |             |
| Excellent (n=67; 9 cases)                     | Ref               | --    |             |

\* adjusted for age, gender, country, specialty, provider type, close exposure inside the workplace without PPE and close exposure outside of the workplace (N=568 cases and N=2316 controls).

\*\* adjusted for age, gender, close exposure inside the workplace without PPE and close exposure outside of the workplace

We did not compare access to PPE Nonexistent vs Excellent due to limited number of cases (9 cases).

**Supplementary Table 2.** Covid-19 exposures and odds ratios of Covid-19 positive test (PCR or antibody) in exposed healthcare workers adjusting for age, gender, and country (N=2614).

|                                                                                                                                                  | <b>OR (95% CI)</b>        | <b>P-value</b> |
|--------------------------------------------------------------------------------------------------------------------------------------------------|---------------------------|----------------|
| <b>Contact with Covid-19 patients in the workplace:</b>                                                                                          |                           |                |
| Not very frequent (5-10% of my time)                                                                                                             | Ref                       | --             |
| Somewhat frequent (11-25% of my time)                                                                                                            | 1.13 (0.74-1.72)          | 0.58           |
| Frequent (26-50% of my time)                                                                                                                     | 1.51 (0.99-2.31)          | 0.056          |
| Very frequent (51-75% of my time)                                                                                                                | 1.92 (1.24-2.97)          | 0.0036         |
| Continuous (greater than 75% of my time)                                                                                                         | 1.92 (1.24-2.97)          | 0.0033         |
| Close contact with any <i>suspected or confirmed</i> case of Covid-19 <i>inside</i> the workplace while <i>not wearing</i> Covid-recommended PPE |                           |                |
|                                                                                                                                                  | No Ref                    | --             |
|                                                                                                                                                  | Not sure 1.42 (1.02-2.00) | 0.041          |
|                                                                                                                                                  | Yes 1.47 (1.12-1.94)      | 0.00064        |
| Close contact with anyone <i>outside</i> the workplace with a confirmed diagnosis of Covid-19                                                    |                           |                |
|                                                                                                                                                  | No Ref                    | --             |
|                                                                                                                                                  | Not sure 0.82 (0.59-1.15) | 0.25           |
|                                                                                                                                                  | Yes 1.73 (1.29-2.31)      | 0.0002         |

**Supplementary Table 3.** Workplace risk factors and odds ratios of positive Covid-19 test (PCR or antibody) in exposed healthcare workers adjusting for age, gender, and country and Model 2 age, gender, country, access to personal protective equipment (PPE) and close exposure to a Covid-19 case outside the workplace (N=2614).

|                                                                                      | Model 1*         | <i>p</i> -value | Model 2**        | <i>p</i> -value |
|--------------------------------------------------------------------------------------|------------------|-----------------|------------------|-----------------|
| <b>Number of shifts per week</b>                                                     | 1.11 (1.02-1.21) | 0.012           | 1.10 (1.01-1.20) | 0.022           |
| <b>Number of work hours per shift</b>                                                | 0.98 (0.92-1.04) | 0.53            | 0.99 (0.93-1.06) | 0.80            |
| <b>Work hours per week</b>                                                           | 1.01 (1.00-1.02) | 0.028           | 1.01 (1.00-1.02) | 0.025           |
| Been in the room of a <i>confirmed</i> Covid-19 patient during any of the following: |                  |                 |                  |                 |
| CPAP or BiPAP                                                                        | 0.89 (0.69-1.15) | 0.37            | 0.92 (0.71-1.19) | 0.52            |
| Nebulization                                                                         | 1.02 (0.78-1.32) | 0.90            | 1.01 (0.77-1.32) | 0.67            |
| Intubation                                                                           | 0.74 (0.56-0.98) | 0.038           | 0.77 (0.58-1.02) | 0.069           |
| CPR                                                                                  | 1.08 (0.80-1.46) | 0.62            | 1.07 (0.79-1.46) | 0.66            |
| None of the above                                                                    | 1.12 (0.87-1.46) | 0.37            | 1.09 (0.84-1.41) | 0.53            |

\* Model 1 adjusted for age, gender, and country

\*\* Model 2 adjusted for age, gender, country, access to personal protective equipment (PPE) and close exposure to a Covid-19 case outside the workplace.

Abbreviations: BiPAP, Bilevel positive airway pressure; CPAP, continuous positive airway pressure; CPR, cardiopulmonary resuscitation

Abbreviations: BiPAP, Bilevel positive airway pressure; CPAP, continuous positive airway pressure; CPR, cardiopulmonary resuscitation

**Supplemental Table 4.** Access to personal protective equipment (PPE) and odds ratios of positive Covid-19 test (PCR or antibody) in exposed healthcare workers

|                                                                                                                                                    | OR (95% CI)      | P-value | P-trend |
|----------------------------------------------------------------------------------------------------------------------------------------------------|------------------|---------|---------|
| <b>Access to PPE All Countries combined*<br/>(N=2614 total; 298 cases (11.4%)):</b>                                                                |                  |         | <0.0001 |
| Nonexistent (no access to at least one of the following: masks, face shields, gowns, and gloves) (n=14; 3 cases)                                   | 5.37 (1.29-22.4) | 0.021   |         |
| Poor (little access to masks, face shields, gowns, and gloves) (n=238; 50 cases)                                                                   | 2.46 (1.57-3.85) | <0.0001 |         |
| Basic (access to at least one daily mask, face shield, gown, and gloves) (n=650; 78 cases)                                                         | 1.60 (1.09-2.35) | 0.017   |         |
| Good (I had access to a change of mask, gown, and gloves if soiled as well as a face shield) (n=1,027; 114 cases)                                  | 1.46 (1.03-2.08) | 0.035   |         |
| Excellent (I had access to a fresh mask, gown, and gloves every time that I entered a new patient room as well as a face shield) (n=657; 53 cases) | Ref              | --      |         |

\*adjusted for age, gender, country, close exposure inside the workplace without PPE and close exposure outside of the workplace (N=298 cases and N=2316 controls).

**Supplementary Table 5.** Number of days, severity and type of Covid-19 symptoms (in those that tested positive by PCR or antibodies) in association with access to personal protective equipment in exposed Healthcare workers (N=298)<sup>1,2\*</sup>

|                                                                                                                                                                                | OR access to PPE<br>Good vs Excellent | OR access to PPE<br>Basic vs Excellent | OR access to PPE<br>Poor vs Excellent | P-value<br>trend |
|--------------------------------------------------------------------------------------------------------------------------------------------------------------------------------|---------------------------------------|----------------------------------------|---------------------------------------|------------------|
| <b>&gt;14 days of symptoms</b>                                                                                                                                                 | 2.01 (0.74-5.49)                      | 2.82 (0.99-8.07)                       | 5.65 (1.84-17.4)                      | 0.0008           |
| <b>Moderate to severe symptoms</b>                                                                                                                                             | 2.93 (1.24-6.99)                      | 2.52 (0.98-6.47)                       | 4.95 (1.76-13.9)                      | 0.038            |
| <b>Specific Covid-19 symptoms:</b>                                                                                                                                             |                                       |                                        |                                       |                  |
| <b>Fatigue and Muscle Aches</b>                                                                                                                                                | 0.77 (0.21-2.73)                      | 1.20 (0.29-4.93)                       | 0.73 (0.16-3.13)                      | 0.65             |
| <b>Loss of taste or smell</b>                                                                                                                                                  | 1.16 (0.46-2.89)                      | 3.32 (1.21-9.07)                       | 2.46 (0.83-7.35)                      | 0.028            |
| <b>Cough</b>                                                                                                                                                                   | 1.55 (0.69-3.50)                      | 1.70 (0.70-4.11)                       | 1.69 (0.65-4.44)                      | 0.54             |
| <b>Diarrhea</b>                                                                                                                                                                | 1.62 (0.65-4.04)                      | 1.77 (0.66-4.70)                       | 1.01 (0.34-3.04)                      | 0.17             |
| <b>Nausea or Vomiting</b>                                                                                                                                                      | 1.16 (0.36-3.72)                      | 4.35 (1.24-15.2)                       | 3.41 (0.87-13.4)                      | 0.056            |
| <b>Sore throat or Headache</b>                                                                                                                                                 | 2.19 (0.98-4.91)                      | 3.76 (1.50-9.39)                       | 2.55 (0.96-46.74)                     | 0.016            |
| <b>Fever or Chills</b>                                                                                                                                                         | 2.11 (0.90-4.92)                      | 1.88 (0.76-4.66)                       | 2.41 (0.86-6.74)                      | 0.216            |
| <b>Shortness of breath or difficulty breathing</b>                                                                                                                             | 1.36 (0.56-3.31)                      | 1.65 (0.62-4.41)                       | 2.91 (1.00-8.44)                      | 0.18             |
| <b>Respiratory symptoms:<br/>Abnormal Chest X-ray, Low oxygen saturation, SpO2 &lt;93% at rest, Respiratory distress, Respiratory rate ≥30 times/min, or acute lung injury</b> | 2.78 (0.59-13.1)                      | 3.73 (0.72-19.3)                       | 7.29 (1.37-38.7)                      | 0.058            |

<sup>1</sup> \*adjusted for age, gender, country, diabetes, pre-diabetes, overweight and high-risk exposure to an individual with Covid-19 outside of the workplace.

<sup>2</sup> Poor access to PPE was described as “little access to masks, face shields, gowns, and gloves.” Basic access was described as “access to at least one daily mask, face shield, gown, and gloves.” Good access to PPE was described as “I had access to a change of mask, gown, and gloves if soiled as well as a face shield.” Excellent access to PPE was described as “I had access to a fresh mask, gown, and gloves every time that I entered a new patient room as well as a face shield.”
